# Supplementary material for: The sexual health of male sex workers in England: analysis of cross-sectional data from genitourinary medicine clinics
Source: PubMed Central journal article supplement (PMC3913221; doi:10.1136/sextrans-2013-051320), 2013-11-22
Supplement: sextrans-2013-051320-s1.pdf [file sextrans-2013-051320-s1.pdf]

Web table 1: Socio-demographic characteristics of and use of services by males attending GUM clinics in England in 2011 by sex worker status

| Socio-demographic characteristics |                                        | Male sex workers<br>(N=488) |      | Other male attendees<br>(N=627,292) |      | p-value          |
|-----------------------------------|----------------------------------------|-----------------------------|------|-------------------------------------|------|------------------|
|                                   |                                        | n                           | %    | n                                   | %    |                  |
| Age*                              | <19                                    | 16                          | 3.3  | 55,168                              | 8.8  |                  |
|                                   | 20-24                                  | 105                         | 21.5 | 157,211                             | 25.1 |                  |
|                                   | 25-29                                  | 130                         | 26.6 | 133,322                             | 21.3 |                  |
|                                   | 30-34                                  | 90                          | 18.4 | 89,110                              | 14.2 |                  |
|                                   | 35-44                                  | 94                          | 19.3 | 107,164                             | 17.1 |                  |
|                                   | 45+                                    | 52                          | 10.7 | 82,216                              | 13.6 | <b>&lt;0.001</b> |
|                                   | Median                                 | 29 years                    |      | 28 years                            |      | <b>0.05</b>      |
| Ethnicity <sup>†</sup>            | White                                  | 307                         | 62.9 | 455,740                             | 72.7 |                  |
|                                   | Mixed                                  | 30                          | 6.1  | 19,184                              | 3.1  |                  |
|                                   | Asian or Asian British                 | 12                          | 2.5  | 30,752                              | 4.9  |                  |
|                                   | Black or Black British                 | 45                          | 9.2  | 61,239                              | 9.8  |                  |
|                                   | Other                                  | 40                          | 8.2  | 14,781                              | 2.4  | <b>&lt;0.001</b> |
| Sexual orientation <sup>‡</sup>   | Heterosexual                           | 197                         | 40.4 | 475,206                             | 75.8 |                  |
|                                   | MSM                                    | 278                         | 57.0 | 92,746                              | 14.8 | <b>&lt;0.001</b> |
| Migrant status <sup>§</sup>       | U.K. born                              | 237                         | 48.6 | 470,140                             | 74.9 |                  |
|                                   | Non-U.K. born                          | 181                         | 37.1 | 116,056                             | 18.5 | <b>&lt;0.001</b> |
| <b>Services used</b>              |                                        |                             |      |                                     |      |                  |
|                                   | Sexual health screen                   | 417                         | 85.5 | 423,853                             | 67.6 | <b>&lt;0.001</b> |
|                                   | HIV test <sup>¶</sup>                  | 383                         | 86.1 | 440,708                             | 73.1 | <b>&lt;0.001</b> |
|                                   | Vaccination (hepatitis B) <sup>§</sup> | 65                          | 13.8 | 23,739                              | 3.8  | <b>&lt;0.001</b> |
|                                   | PEPSE                                  | 22                          | 4.5  | 2,750                               | 0.4  | <b>&lt;0.001</b> |

\*Age was unknown for 1 male sex worker and 101 other male attendees. <sup>†</sup>Ethnicity was unknown for 54 male sex workers and 45,596 other male attendees. <sup>‡</sup>Sexual orientation was unknown for 13 male sex workers and 59,340 other male attendees. <sup>§</sup>Migrant status was unknown for 70 male sex workers and 41,096 other male attendees. <sup>¶</sup>Of those appropriate to test for HIV i.e. not recorded as known HIV positive or attending for HIV related care at first visit in 2011 (n=445 for male sex workers and n=602,840 for other male attendees) <sup>§</sup>Of those appropriate to receive hepatitis vaccination i.e. not diagnosed with hepatitis B or recorded as known hepatitis B immune in 2011 (n=470 for male sex workers and n=620,738 for other male attendees). PEPSE= Post-exposure prophylaxis for HIV following sexual exposure. MSM = Men who have sex with men

Web table 2: Socio-demographic characteristics of and use of services by male sex workers attending GUM clinics in England in 2011 by migrant status

| Socio-demographic characteristics |                                        | UK born MSW<br>(N=237) |      | Migrant MSW<br>(N=181) |      | p-value          |
|-----------------------------------|----------------------------------------|------------------------|------|------------------------|------|------------------|
|                                   |                                        | n                      | %    | n                      | %    |                  |
| Age*                              | <19                                    | 10                     | 4.2  | 3                      | 1.7  | <b>0.04</b>      |
|                                   | 20-24                                  | 51                     | 21.5 | 38                     | 21.0 |                  |
|                                   | 25-29                                  | 59                     | 24.9 | 55                     | 30.4 |                  |
|                                   | 30-34                                  | 41                     | 17.3 | 39                     | 21.5 |                  |
|                                   | 35-44                                  | 42                     | 17.7 | 35                     | 19.3 |                  |
|                                   | 45+                                    | 34                     | 14.3 | 10                     | 5.5  |                  |
|                                   | Median                                 | 29 years               |      | 29 years               |      |                  |
| Ethnicity <sup>†</sup>            | White                                  | 174                    | 73.4 | 102                    | 56.4 | <b>&lt;0.001</b> |
|                                   | Mixed                                  | 15                     | 6.3  | 15                     | 8.3  |                  |
|                                   | Asian or Asian British                 | 3                      | 1.3  | 8                      | 4.4  |                  |
|                                   | Black or Black British                 | 29                     | 12.2 | 12                     | 6.6  |                  |
|                                   | Other                                  | 3                      | 1.3  | 28                     | 15.5 |                  |
| Sexual orientation <sup>‡</sup>   | Heterosexual                           | 147                    | 62.0 | 36                     | 19.9 | <b>&lt;0.001</b> |
|                                   | MSM                                    | 83                     | 35.0 | 140                    | 77.3 |                  |
| Region of birth<br>(for migrants) | U.K.                                   |                        |      | n/a                    | n/a  | n/a              |
|                                   | Europe <sup>¥</sup>                    |                        |      | 45                     | 24.9 |                  |
|                                   | Eastern Europe                         |                        |      | 22                     | 12.2 |                  |
|                                   | Africa                                 |                        |      | 13                     | 7.2  |                  |
|                                   | Asia                                   |                        |      | 23                     | 12.7 |                  |
|                                   | Australia                              |                        |      | 3                      | 1.7  |                  |
|                                   | North America                          |                        |      | 5                      | 2.8  |                  |
|                                   | South America                          |                        |      | 70                     | 38.7 |                  |
| <b>Services used</b>              |                                        |                        |      |                        |      |                  |
|                                   | Sexual health screen                   | 196                    | 82.7 | 155                    | 85.6 | 0.42             |
|                                   | HIV test <sup>¶</sup>                  | 189                    | 84.7 | 130                    | 84.4 | 0.93             |
|                                   | Vaccination (hepatitis B) <sup>§</sup> | 23                     | 10.2 | 23                     | 13.1 | 0.37             |
|                                   | PEPSE                                  | 7                      | 3.0  | 11                     | 6.1  | 0.12             |

\*Age was unknown for 1 migrant male sex worker (MSW). <sup>†</sup>Ethnicity was unknown for 13 UK born and 16 migrant MSWs.

<sup>‡</sup>Sexual orientation was unknown for 7 UK born and 5 migrant MSWs. <sup>¥</sup>Europe excludes UK and Eastern Europe. <sup>¶</sup>Of those appropriate to test for HIV i.e. not recorded as known HIV positive or attending for HIV related care at first visit in 2011 (n=223 for UK born and n=154 for migrant MSWs) <sup>§</sup>Of those appropriate to receive hepatitis vaccination i.e. not diagnosed with hepatitis B or recorded as known hepatitis B immune in 2011 (n=226 for UK born and n=176 for migrant MSWs).

PEPSE= Post-exposure prophylaxis for HIV following sexual exposure. MSM = Men who have sex with men

Web Table 3: Number of males diagnosed with STIs of interest through GUM clinics in 2011 stratified by sex worker and migrant status and sexual orientation

|                   | Other male attendees | All MSWs | UK born MSWs | Migrant MSWs |
|-------------------|----------------------|----------|--------------|--------------|
| <b>Chlamydia</b>  |                      |          |              |              |
| Heterosexual      | 38,802               | 63       | 46           | 12           |
| MSM               | 7,135                | 49       | 10           | 33           |
| Not specified     | 3,393                | 1        | 1            | 0            |
| Total             | 49,330               | 113      | 57           | 45           |
| <b>Gonorrhoea</b> |                      |          |              |              |
| Heterosexual      | 5,922                | 13       | 10           | 3            |
| MSM               | 7,063                | 64       | 18           | 35           |
| Not specified     | 1,170                | 1        | 0            | 1            |
| Total             | 14,155               | 78       | 28           | 39           |
| <b>Syphilis</b>   |                      |          |              |              |
| Heterosexual      | 455                  | 0        | 0            | 0            |
| MSM               | 1,922                | 10       | 3            | 6            |
| Not specified     | 155                  | 1        | 1            | 0            |
| Total             | 2,532                | 11       | 4            | 6            |
| <b>HIV</b>        |                      |          |              |              |
| Heterosexual      | 859                  | 0        | 0            | 0            |
| MSM               | 1,515                | 14       | 5            | 9            |
| Not specified     | 231                  | 0        | 0            | 0            |
| Total             | 2,605                | 14       | 5            | 9            |
